# Supplementary material
Source: HighWire-hosted journal article supplement (https://www.cmajopen.ca/highwire/filestream/81163/field_highwire_adjunct_files/0/2017-0080-1-at.pdf)
Supplement: 2017-0080-1-at.pdf [file 2017-0080-1-at.pdf]

## Appendix 1 (as supplied by the authors): Health domains measured by the SF-8, definitions and response options

| Health domain        | Definition                                                                                                                | Response options                 | Assigned SF-36 score* | SF-8 US norm scores <sup>†</sup> |
|----------------------|---------------------------------------------------------------------------------------------------------------------------|----------------------------------|-----------------------|----------------------------------|
| General health       | Overall rating of health in past week                                                                                     | Very poor                        | 22.8                  | 49.4                             |
|                      |                                                                                                                           | Poor                             | 32.6                  |                                  |
|                      |                                                                                                                           | Fair                             | 38.4                  |                                  |
|                      |                                                                                                                           | Good                             | 46.4                  |                                  |
|                      |                                                                                                                           | Very good                        | 52.8                  |                                  |
|                      |                                                                                                                           | Excellent                        | 59.5                  |                                  |
| Physical functioning | Extent of physical health problems limiting usual physical activities (e.g., walking, climbing stairs) in past week       | Could not do physical activities | 21.5                  | 48.3                             |
|                      |                                                                                                                           | Quite a lot                      | 30.3                  |                                  |
|                      |                                                                                                                           | Somewhat                         | 40.1                  |                                  |
|                      |                                                                                                                           | Very little                      | 48.3                  |                                  |
|                      |                                                                                                                           | Not at all                       | 54.1                  |                                  |
| Role – physical      | Extent of difficulties in past week doing daily work (at home and away from home) because of physical health              | Could not do daily work          | 23.0                  | 48.6                             |
|                      |                                                                                                                           | Quite a lot                      | 28.3                  |                                  |
|                      |                                                                                                                           | Somewhat                         | 38.7                  |                                  |
|                      |                                                                                                                           | Very little                      | 46.9                  |                                  |
|                      |                                                                                                                           | Not at all                       | 54.0                  |                                  |
| Bodily pain          | Extent of bodily pain in past week                                                                                        | Very severe                      | 25.5                  | 50.0                             |
|                      |                                                                                                                           | Severe                           | 31.5                  |                                  |
|                      |                                                                                                                           | Moderate                         | 40.1                  |                                  |
|                      |                                                                                                                           | Mild                             | 47.7                  |                                  |
|                      |                                                                                                                           | Very mild                        | 53.4                  |                                  |
|                      |                                                                                                                           | None                             | 60.8                  |                                  |
| Vitality             | Extent of energy in past week                                                                                             | None                             | 28.1                  | 50.1                             |
|                      |                                                                                                                           | A little                         | 35.8                  |                                  |
|                      |                                                                                                                           | Some                             | 45.2                  |                                  |
|                      |                                                                                                                           | Quite a lot                      | 55.6                  |                                  |
|                      |                                                                                                                           | Very much                        | 61.8                  |                                  |
| Social functioning   | Extent of physical health or emotional problems limiting usual social activities with family or friends in past week      | Could not do social activities   | 23.4                  | 48.5                             |
|                      |                                                                                                                           | Quite a lot                      | 29.5                  |                                  |
|                      |                                                                                                                           | Somewhat                         | 40.4                  |                                  |
|                      |                                                                                                                           | Very little                      | 49.5                  |                                  |
|                      |                                                                                                                           | Not at all                       | 55.3                  |                                  |
| Role – emotional     | Extent of personal or emotional problems in past week limiting ability to do usual work, school or other daily activities | Could not do daily activities    | 21.7                  | 47.0                             |
|                      |                                                                                                                           | Quite a lot                      | 29.3                  |                                  |
|                      |                                                                                                                           | Somewhat                         | 38.1                  |                                  |
|                      |                                                                                                                           | Very little                      | 45.7                  |                                  |
|                      |                                                                                                                           | Not at all                       | 52.4                  |                                  |
| Mental health        | Extent of having been bothered by emotional problems (e.g., feeling anxious, depressed, irritable) in past week           | Extremely                        | 21.4                  | 49.0                             |
|                      |                                                                                                                           | Quite a lot                      | 31.6                  |                                  |
|                      |                                                                                                                           | Somewhat                         | 41.5                  |                                  |
|                      |                                                                                                                           | Very little                      | 49.6                  |                                  |
|                      |                                                                                                                           | Not at all                       | 58.8                  |                                  |

\*The SF-36 measures each health domain, using 2–10 Likert-scaled items. Health domains in the SF-36 are scored by transforming the score of each item (minimum 1, maximum 2–6, depending on the item) into a 0–100 scale, and averaging scores of each health domain. Therefore, SF-36 health domain scores have a possible range of 0–100, while SF-8 health domain scores have smaller possible ranges.

<sup>†</sup>Health domain scores above and below the respective normative health domain score indicate above or below average health, respectively, as compared to the US normative population.
